# Supplementary material for: Efficient sampling of conformational space via unbiased molecular dynamics in multiple low-dimensional collective variable spaces
Source: Research Square preprint supplement (doi:10.21203/rs.3.rs-6157888/v1), 2025-03-26
Supplement: Supplementary file 1 [file 0676a5376fb36c14d089fca1.docx]

**Supplemental Materials for “Efficient Sampling of Conformational Space via Unbiased Molecular Dynamics in Multiple Low-Dimensional Collective Variable Spaces”**

Wentao Zhu[[1]](#footnote-1)[[2]](#footnote-2)*, Wenfei Li[[3]](#footnote-3), Bing Bu1, LinLin Zhu1, Xiang Wang1, and Linhong Deng1[[4]](#footnote-4)†

**Construction and definition of the two-dimensional (2D) double-basin model potential**

The 2D double-basin model potential is constructed by placing 51 Gaussian potentials uniformly along the polyline path (0,0)→(1,1)→(0,2)→(1,3)→(2,2)→(3,3), with adjacent Gaussian centers spaced at 0.1 intervals. Let denote the centers of these Gaussian potentials. The model potential is then defined as:

(S1)

where the weights are given by:

**Results of one-dimensional (1D) and 2D double-basin model potentials using Metadynamics**

We first performed Metadynamics simulations on the 2D double-basin model potential and compared its efficiency with EWM under equivalent accuracy conditions. The Metadynamics parameters were set as follows: Gaussian potential deposition interval , Gaussian width , ensuring consistency with EWM's saving interval (0.005) and CV space bin size (0.04). Notably, unlike EWM, the Gaussian potentials in Metadynamics are two-dimensional. The Gaussian height w was set to 0.007 to achieve a standard deviation of free energy differences comparable to EWM, approximately 0.8 at equilibrium (0.86 for EWM simulations).

As shown in the results, first reached the reference value of 15kBT at MD steps, while fell below 0.86 at steps. Based on these observations, we conclude that Metadynamics requires approximately steps to achieve accuracy comparable to EWM simulations.


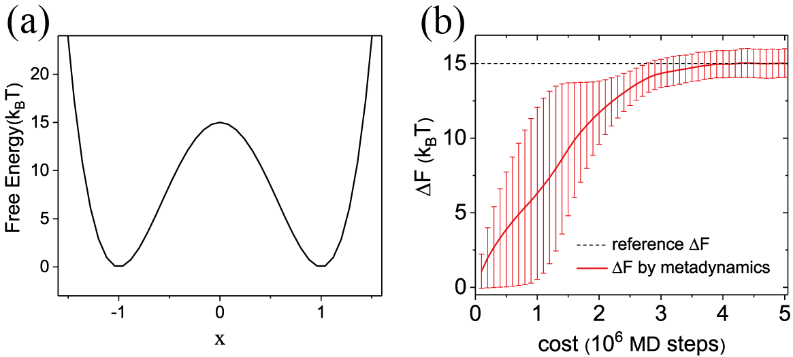


Fig. S1 Results of Metadynamics simulations in the one-dimensional (1D) double-basin model potentials. (a) The energy curve of the 1D model potential. (b) Evolution of the free energy difference (∆F) between the potential well at *x*=−1 and the saddle point at *x*=0 in the 1D model potential as a function of computational cost, with standard deviations indicated by error bars. The results are averaged over 500 independent replicas.

Next, we compared the efficiency of Metadynamics and EWM in a simple 1D double-basin potential (as shown in Fig. S1), defined by the potential function . Under default parameters, EWM required an average trajectory length of steps to reach equilibrium, with a trajectory acceptance rate of 78%, resulting in a total computational cost of MD steps. At this point, the accuracy metric was 0.92.

For Metadynamics, the Gaussian height *w* was set to 0.004 to achieve a comparable of approximately 0.9 at equilibrium. As shown in Fig. S1b, for Metadynamics first fell below 0.92 at steps, while reached the reference value of 15kBT at MD steps. Thus, Metadynamics required approximately MD steps to achieve accuracy comparable to EWM. By comparing the computational costs, we found that Metadynamics was approximately 7.9 times more efficient than EWM in this model potential.

**Construction and definition of the nine-dimensional (9D) double-basin model potentials**

We constructed four types of 9D double-basin model potentials, each comprising 91 Gaussian potentials uniformly distributed along distinct polylines of length 9 in 9D CV space, with Gaussian centers spaced at 0.1 intervals. The Gaussian potentials are identical across all types, ensuring identical energy profiles along the minimum energy path (MEP). The systems differ in the number of dimensions involved in the polyline extension directions, which determines the minimum number of CVs required for enhanced sampling: 1, 3, 5, or 9. The four polyline configurations are defined as follows:

1CV-type: (0,...,0)→(9,0,...,0).

3CVs-type: (0,...,0)→(3,0,...,0)→(3,3,0,...,0)→(3,3,3,0,...,0).

5CVs-type: (0,...,0)→(1.8,0,...,0)→(1.8,1.8,0,...,0)→…(1.8,1.8,1.8,1.8,1.8,0,...,0).

9CVs-type: (0,...,0)→(1,0,...,0)→(1,1,0,...,0)→…(1,...,1).

Let denote the centers of these Gaussian potentials. The 9CVs-type potential is defined as:

(S2)

where the weights are given by:

The 1CV-type, 3CVs-type, and 5CVs-type potentials are defined analogously. For example, the weights for 5CVs-type potential are given by:

**Results of multibasin model potential using EWM in N+m mode**


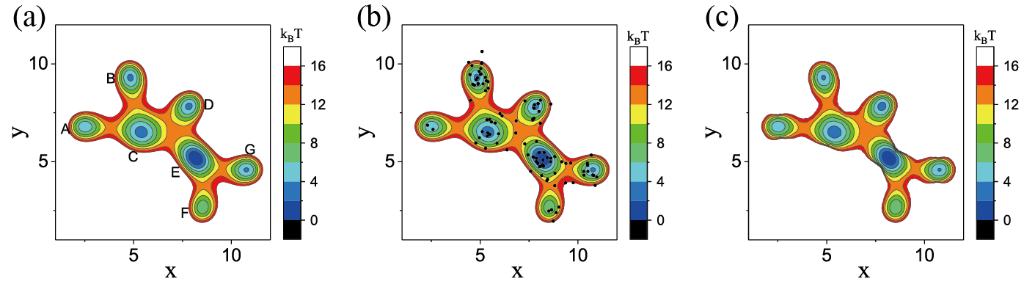


Fig. S2: Results of the multibasin model potential with the N+m mode using conformations from high-temperature MD simulation. (a) Energy landscape of the model potential. (b) 100 conformations obtained from a short high-temperature MD simulation ( MD steps at T=5kBT). (c) Average free energy landscape derived from the N+m mode using the conformations in (b) as starting points. All results are averaged over 50 independent equilibrium simulations.

Tabel. S1: Comparison of potential well depths (in units of kBT) between reference conventional simulations (Ref) and EWM simulations for the multibasin model potential. Basin E serves as the reference basin (as shown in Fig. S2a). Free energy differences were calculated based on 50 independent simulations in standard mode.

|  | Basin A | Basin B | Basin C | Basin D | Basin F | Basin G |
| --- | --- | --- | --- | --- | --- | --- |
| Ref | 4.4 | 3.5 | 3.0 | 3.4 | 6.4 | 3.7 |
| EWM | 4.61.6 | 3.71.4 | 3.01.2 | 3.61.0 | 6.51.0 | 3.9.9 |

Tabel. S2: Comparison of potential well depths (in units of kBT) between reference conventional simulations (Ref) and EWM simulations for the multibasin model potential. Basin E serves as the reference basin (as shown in Fig. S2a). Free energy differences were calculated based on 50 independent simulations using the N+m mode combined with 2D CV spaces.

|  | Basin A | Basin B | Basin C | Basin D | Basin F | Basin G |
| --- | --- | --- | --- | --- | --- | --- |
| Ref | 4.4 | 3.5 | 3.0 | 3.4 | 6.4 | 3.7 |
| EWM | 4.51.8 | 3.81.5 | 2.81.2 | 3.31.4 | 6.61.0 | 3.91.2 |

Tabel. S3 Comparison of potential well depths (in units of kBT) between reference conventional simulations (Ref) and EWM simulations for the multibasin model potential. Basin E serves as the reference basin (as shown in Fig. S2a). Free energy differences were calculated based on 50 independent simulations using the N+m mode, initialized with 100 conformations obtained from a short high-temperature MD simulation (as shown in Fig. S2b).

|  | Basin A | Basin B | Basin C | Basin D | Basin F | Basin G |
| --- | --- | --- | --- | --- | --- | --- |
| Ref | 4.4 | 3.5 | 3.0 | 3.4 | 6.4 | 3.7 |
| EWM | 4.41.7 | 3.81.9 | 2.81.2 | 3.11.3 | 6.11.2 | 3.91.2 |

**Results of calmodulin using T-REMD**

To reconstruct continuous trajectories from T-REMD, physical trajectories are generated by tracing the exchange history of replicas across temperatures. This process involves stitching together trajectory segments from different replicas based on their temperature transitions, ensuring temporal continuity while preserving the system's dynamical properties. Barrier-crossing events were then extracted from these physical trajectories (see Figs. S4(b)–S4(f)). The computational cost is defined as the simulation time required to achieve at least one round-trip transition between all adjacent basins. Notably, each T-REMD simulation comprises eight replicas and eight physical trajectories.

Here, we describe how the state trajectory in (b) is derived from the trajectories in (c)-(f). The state is determined by the combined open/closed states of the two domains, as illustrated in Fig. 3 of the main text. For example, if both the N-domain and C-domain are in the closed state, the system is in state A; if both domains are in the open state, it corresponds to state D; if either domain is in the unfolded state, the system is considered unfolded. The open/closed/unfolded state of each domain is determined as follows:

Closed state： and .

Open state: and .

Unfolded state: or .

No change: If none of the above conditions are met, the state remains unchanged from the previous frame.


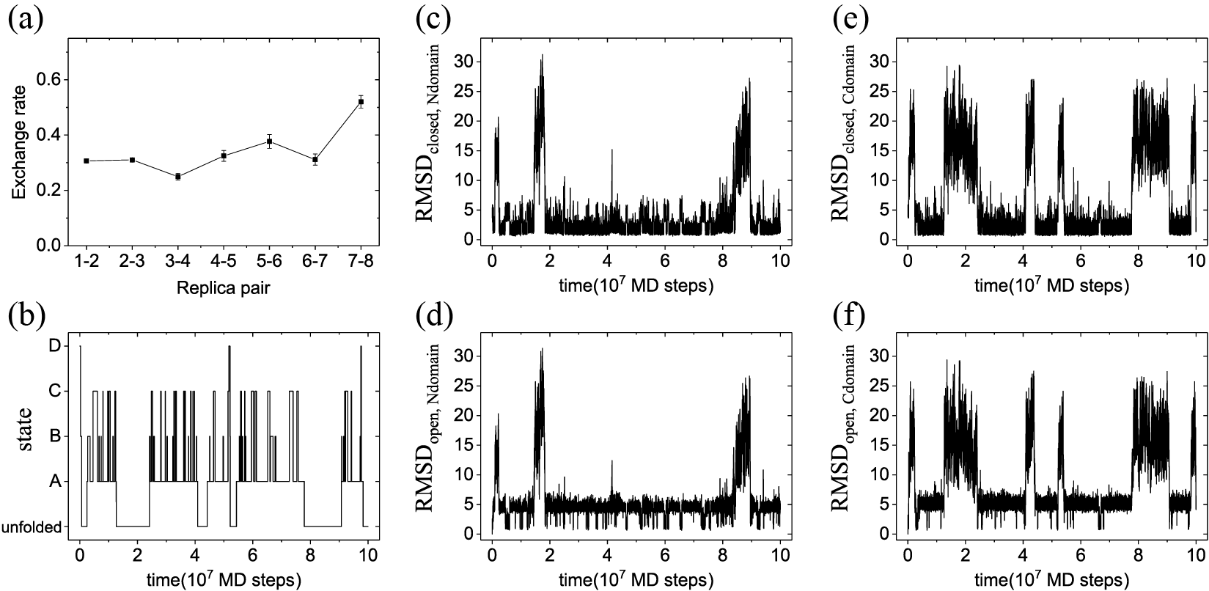


Fig. S3 Results of calmodulin simulations using T-REMD. (a) Average acceptance ratios between neighboring replicas. Eight replicas were employed, with temperatures set at 300, 320, 340, 360, 370, 380, 390, and 400 K. Exchanges were attempted every 10 MD steps, and each replica was simulated for MD steps. (b) A representative state trajectory reconstructed from the data in (c)-(f). (c)-(f) A representative trajectory projected onto the following collective variables (CVs): (c) , (d) , (e) , and (f) .

1. Institute of Biomedical Engineering and Health Sciences, School of Medical and Health Engineering, Changzhou University, Changzhou, 213164, China [↑](#footnote-ref-1)
2. * Email: zwt@cczu.edu.cn; [↑](#footnote-ref-2)
3. School of Physics, National Laboratory of Solid State Microstructure, and Collaborative Innovation Center of Advanced Microstructures, Nanjing University, Nanjing 210093, China [↑](#footnote-ref-3)
4. † Email: dlh@cczu.edu.cn [↑](#footnote-ref-4)
